# Supplementary material for: A novel label-free aptasensor based on target-induced structure switching of aptamer-functionalized mesoporous silica nanoparticles
Source: Royal Society of Chemistry journal article supplement (doi:10.1039/c5ra18918g), 2015-01-01
Supplement: c5ra18918g1.pdf [file c5ra18918g1.pdf]

## A novel label free aptasensor based on target-induced structure switching of aptamers functionalization mesoporous silica nanoparticle

Lili Du, Yu Zhang, Yan Du, Dongzhi Yang, Fenglei Gao\*, and Daoquan Tang\*

Jiangsu Key Laboratory of New Drug Research and Clinical Pharmacy, School of Pharmacy, Xuzhou Medical College, 221004, Xuzhou, China.

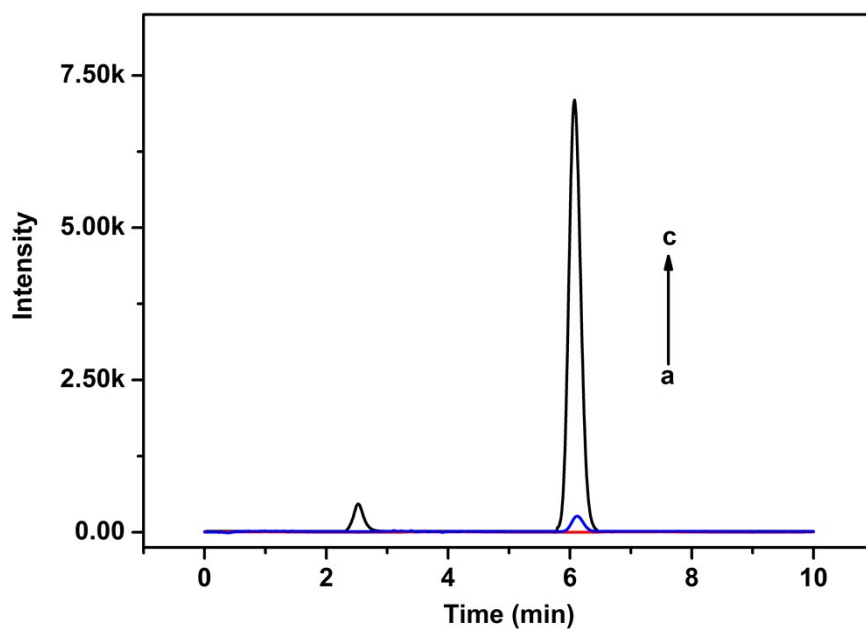

**Fig. S1** HPLC of (a) blank; (b) MSN; (c) ATP and MSN for 60 min based on water as solvent.

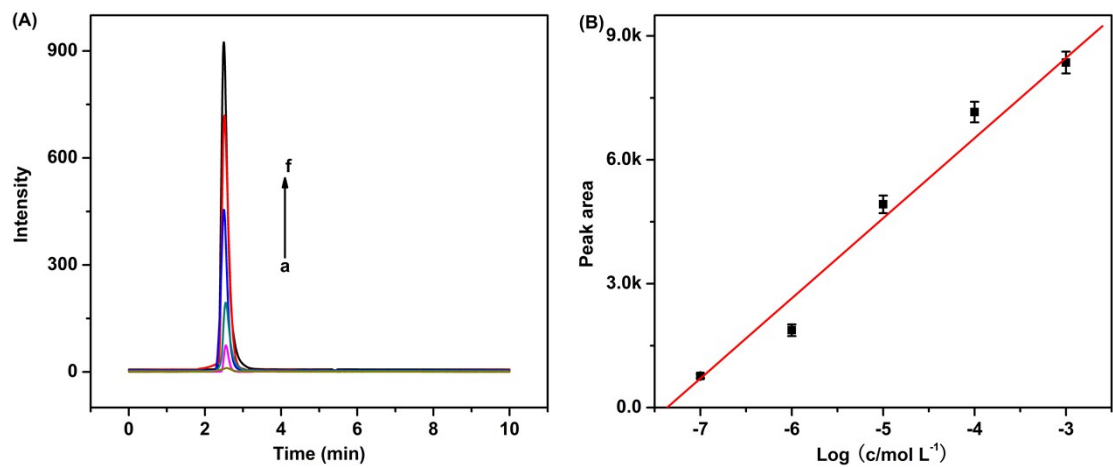

**Fig. S2** (A) HPLC responses of ATP at concentrations of 10 nM to 1.0 mM (from a to f), and (B) calibration curve. Error bars represent standard deviations of three parallel experiments.

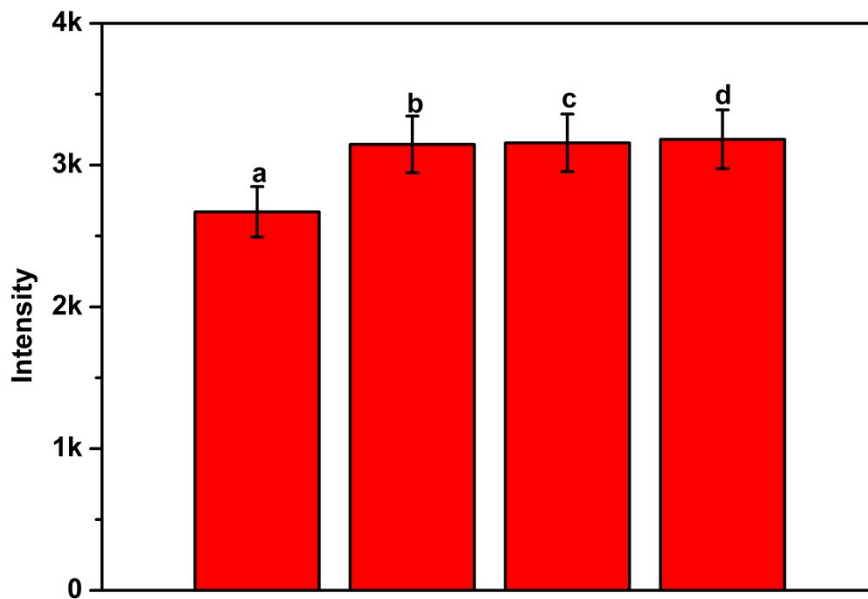

**Fig. S3** Histograms of the selectivity of the aptamer–MSN system examined by being incubated in the following samples under the same experimental conditions: (a) adenosine, (b) AMP, (c) ADP and (d) ATP; the concentration of ATP, AMP, ADP, and adenosine is  $0.1\mu\text{M}$ , respectively.
